# Supplementary material for: Micrometer-sized network structure of novel DNA–lipid conjugates induced by heat stimulation
Source: Royal Society of Chemistry journal article supplement (doi:10.1039/c5sm01456e), 2015-01-01
Supplement: c5sm01456e2.pdf [file c5sm01456e2.pdf]

## **Electric Supplementary Information**

### **Micrometer-sized network structure of novel DNA-lipid conjugates induced by heat stimulation**

K. Takahashi,<sup>a,b</sup> M. Matsuo,<sup>a</sup> T. Banno,<sup>a,†</sup> and T. Toyota<sup>\*,a,c</sup>

<sup>a</sup> Department of Basic Science, Graduate School of Arts and Sciences, The University of Tokyo, 3-8-1 Komaba, Meguro, Tokyo 153-8902, Japan. E-mail: cttoyota@mail.ecc.u-tokyo.ac.jp

<sup>b</sup> Department of Lipid Signaling, Research Institute, National Center for Global Health and Medicine, Shinjuku, Tokyo 162-8655, Japan  
E-mail: ktakahashi@ri.ncgm.go.jp

<sup>c</sup> Research Center for Complex Systems Biology, Graduate School of Arts and Sciences, The University of Tokyo, 3-8-1 Komaba, Meguro, Tokyo 153-8902, Japan.

<sup>†</sup> Present address: Department of Applied Chemistry, Faculty of Science and Technology, Keio University, 3-14-1 Hiyoshi, Kohoku-ku, Yokohama, Kanagawa 223-8522, Japan.

(A)

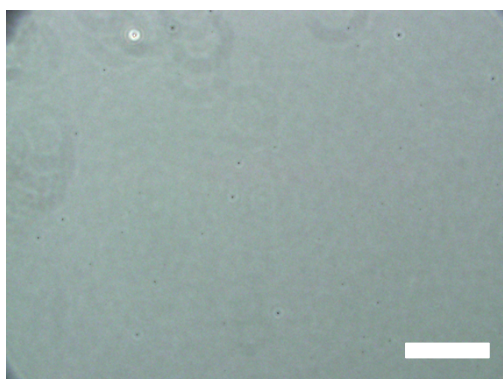

(B)

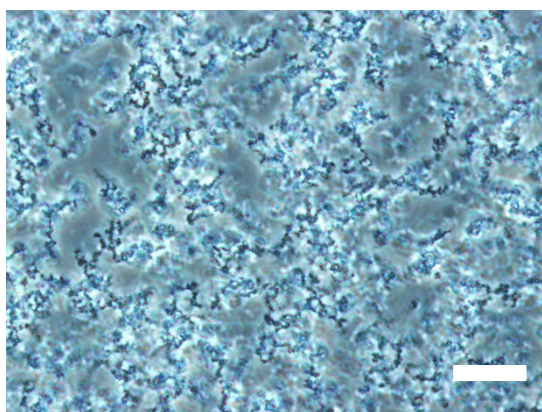

(C)

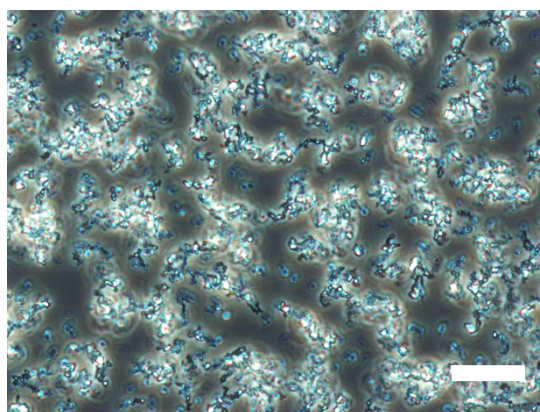

Fig. S1. Phase contrast microscopy images of  $\text{Mg}^{2+}$ -containing HEPES buffers including  $32\ \mu\text{M}$  DNA-RNA chimera lipid **1** after incubation under different temperature. (A) The solution of DNA-RNA chimera lipid **1** in the  $\text{Mg}^{2+}$ -containing buffer exhibited no constitution of the micrometer-sized structure 20 minutes after preparation of the chamber under room temperature. Bar =  $50\ \mu\text{m}$ . (B) The solution of DNA-RNA chimera lipid **1** incubated at  $60^\circ\text{C}$  for 20 minutes in the  $\text{Mg}^{2+}$ -containing buffer afforded similar structure observed in the case of heat stimulation of  $40^\circ\text{C}$  (see main text). Bar =  $20\ \mu\text{m}$ . (C) In the case of incubation of the solution at  $95^\circ\text{C}$  for 20 minutes, the micrometer-sized network structure were constituted in more condensed manner than the case of  $40^\circ\text{C}$ . Bar =  $20\ \mu\text{m}$ .

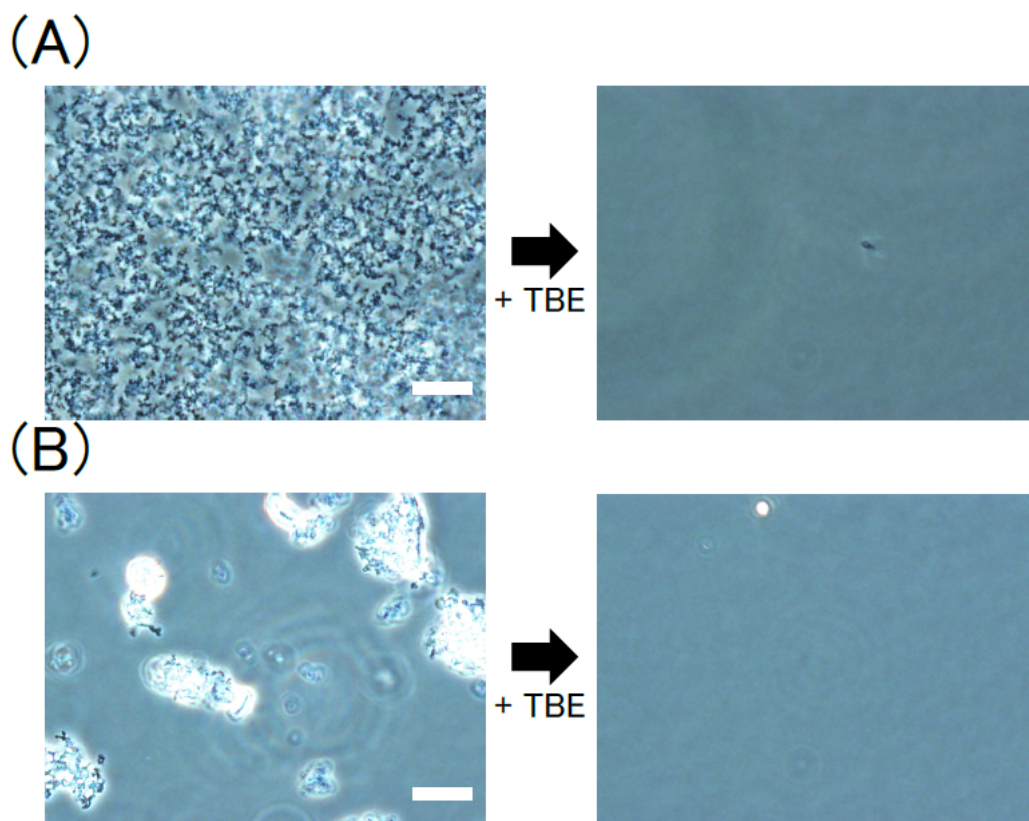

Fig. S2. Collapse of the micrometer-sized structures composed of each DNA-lipid conjugate after TBE buffer injection. (A) Phase contrast microscopy images of the  $\text{Mg}^{2+}$ -containing buffer solutions (20  $\mu\text{L}$  of 50 mM HEPES buffer including 10 mM  $\text{MgCl}_2$ ) containing the structure of DNA-RNA chimera lipid **1** incubated at 40°C for 15 minutes before and after 5  $\mu\text{L}$  1  $\times$  TBE buffer injection. (B) Phase contrast microscopy images of the  $\text{Mg}^{2+}$ -containing buffer solutions (20  $\mu\text{L}$  of 50 mM HEPES buffer including 10 mM  $\text{MgCl}_2$ ) containing the granules of 1:1 mixture of DNA-lipid conjugate **2** and **3** incubated at room temperature before and after 5  $\mu\text{L}$  1  $\times$  TBE buffer injection. Bar = 20  $\mu\text{m}$ . The collapse of the structures by the chelating for the  $\text{Mg}^{2+}$  ions by TBE buffer (including EDTA) implied that micrometer-sized structures of DNA-lipid conjugates were constituted in the presence of  $\text{Mg}^{2+}$ .

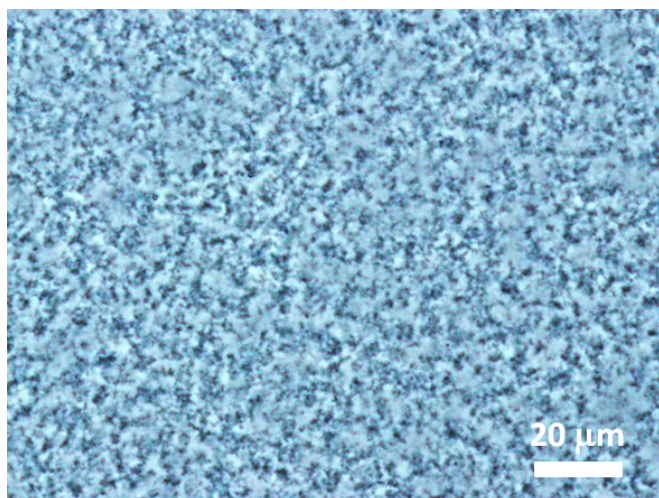

Fig. S3. Phase contrast microscopy image of the sample dispersion of **1** in the  $\text{Mg}^{2+}$ -containing buffer incubated at  $23 \pm 1$  °C for 5 days.

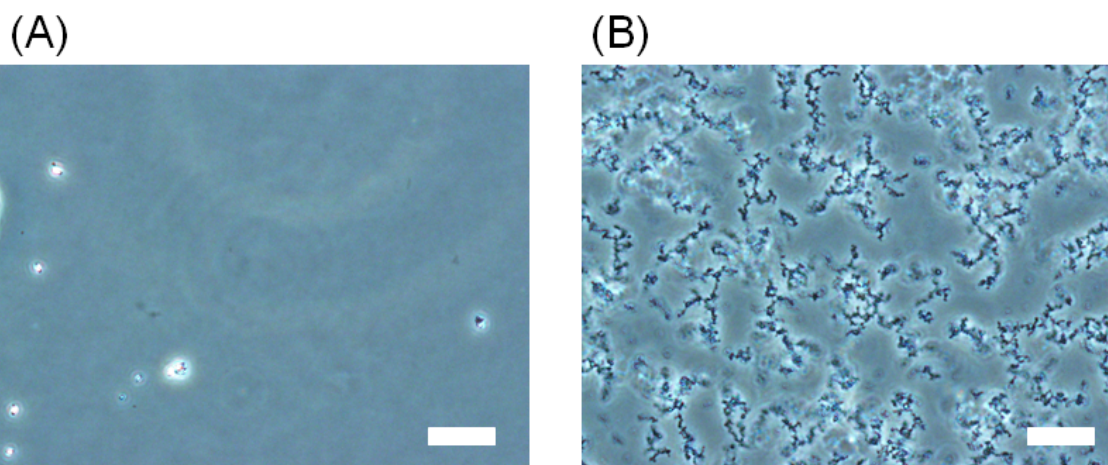

Fig. S4. Phase contrast microscopy images of the sample dispersion of **1** in the buffer without  $\text{Mg}^{2+}$  incubated at 40 °C for 30 min and cooled down at room temperature for 30 min. The sample dispersion was observed before (A) and after (B) the injection of a small amount of the  $\text{MgCl}_2$  solution (the final concentration in the sample was 10 mM). Bar = 20  $\mu\text{m}$ .



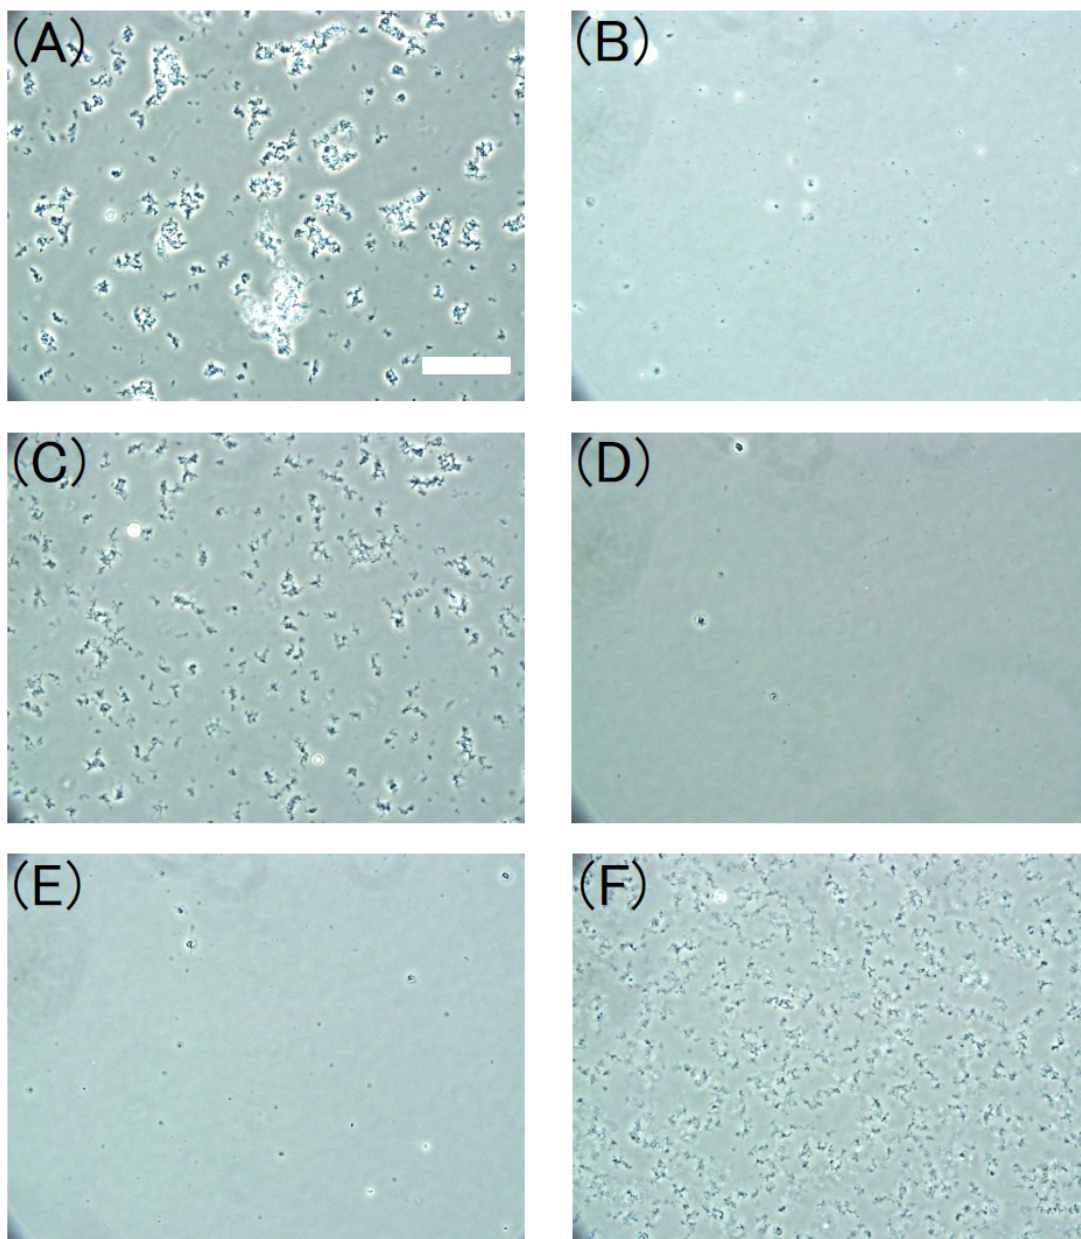

Fig. S5. Phase contrast microscopy images of  $Mg^{2+}$ -containing HEPES buffers including 1:1 mixtures of each oligo-A and oligo-T based DNA-lipid conjugate with oleoyl chains. The total concentration in each mixture was  $32\ \mu M$ . (A) A8 and T11 (B) T8 and A11 (C) A8 and A11 (D) T8 and T11 (E) A8 and T8 (F) T11 and A11. Bar =  $50\ \mu m$ . Oligo-A based DNA-lipid conjugate A8 and A11 had the following sequences; 5'-AAAAAAAA-3' with the 5' terminus modified by amide bonds linked to oleic acid, and 5'-AAAAAAAAAAAA-3' with the 3' terminus modified by amide bonds linked to oleic acid. Oligo-T based DNA-lipid conjugate T8 and T11 had the following sequences; 5'-TTTTTTTT-3' with 5' terminus modified by amide bonds linked to oleic acid, and 5'-TTTTTTTTTTTT-3' with 3' terminus modified by amide bonds linked to oleic acid, respectively.

## Description of movie clip

Movie S1. Movie of the induction of a micrometer-sized three-dimensional network structure following heat stimulation (40°C) of DNA-RNA chimera lipid **1** in the Mg<sup>2+</sup>-containing buffer (Figure 4A in main text). Movie was generated from phase contrast images taken with a time interval of 1 frame every 30 s. The granular structures appeared in the specimen 10 minutes after start of heat stimulation. The size of the observation space is 296  $\mu\text{m}$   $\times$  223  $\mu\text{m}$ .
